# Supplementary material for: Differed Adaptive Strategies to Nutrient Status between Native and Exotic Mangrove Species
Source: MDPI journal article supplement (doi:10.3390/f13050804), 2022-05-20
Supplement: s1 [file s1]

## SUPPLEMENTARY INFORMATION

### Differed Adaptive Strategies to Nutrient Status between Native

and Exotic Mangrove species.

**Table S1.** Results of a three-way ANOVA analyzing the effects of plant species, stand age and tide level on the soil and foliar stoichiometries.

|                                              |                 | Plant species | Stand age | Tide level |
|----------------------------------------------|-----------------|---------------|-----------|------------|
| soil C                                       | <i>F</i> -value | 0.81          | 3.16      | 10.37      |
|                                              | <i>P</i> -value | 0.38          | 0.06      | 0.01       |
| soil N                                       | <i>F</i> -value | 0.81          | 3.16      | 10.37      |
|                                              | <i>P</i> -value | 0.38          | 0.06      | 0.01       |
| soil P                                       | <i>F</i> -value | 0             | 0.17      | 1.7        |
|                                              | <i>P</i> -value | 0.99          | 0.85      | 0.2        |
| soil C:N                                     | <i>F</i> -value | 0.49          | 4.31      | 2.96       |
|                                              | <i>P</i> -value | 0.62          | 0.04      | 0.1        |
| soil C:P                                     | <i>F</i> -value | 3.35          | 2.39      | 2.69       |
|                                              | <i>P</i> -value | 0.08          | 0.11      | 0.03       |
| soil N:P                                     | <i>F</i> -value | 0.31          | 1.52      | 0.04       |
|                                              | <i>P</i> -value | 0.58          | 0.24      | 0.84       |
| Soil extract NH <sub>4</sub> <sup>+</sup> -N | <i>F</i> -value | 5.14          | 4.57      | 15.36      |
|                                              | <i>P</i> -value | 0.12          | 0.2       | 0.16       |
| Soil extract NO <sub>3</sub> <sup>-</sup> -N | <i>F</i> -value | 0.41          | 0.74      | 0.21       |
|                                              | <i>P</i> -value | 0.04          | 0.67      | 0.06       |
| Foliar C                                     | <i>F</i> -value | 0.75          | 1.16      | 0.02       |
|                                              | <i>P</i> -value | 0.04          | 0.33      | 0.89       |
| Foliar N                                     | <i>F</i> -value | 0.94          | 2.26      | 0.15       |
|                                              | <i>P</i> -value | 0.03          | 0.12      | 0.7        |
| Foliar P                                     | <i>F</i> -value | 0.29          | 0.39      | 4.72       |
|                                              | <i>P</i> -value | 0.6           | 0.68      | 0.06       |
| Foliar C:N                                   | <i>F</i> -value | 2.44          | 0.19      | 1.98       |
|                                              | <i>P</i> -value | 0.03          | 0.83      | 0.17       |
| Foliar C:P                                   | <i>F</i> -value | 3.05          | 9.82      | 0.37       |
|                                              | <i>P</i> -value | 0.04          | 0.41      | 0.7        |
| Foliar N:P                                   | <i>F</i> -value | 3.05          | 9.15      | 0.51       |
|                                              | <i>P</i> -value | 0.04          | 0.42      | 0.6        |
| Foliar Cu                                    | <i>F</i> -value | 6.26          | 0.77      | 3.1        |
|                                              | <i>P</i> -value | 0.02          | 0.39      | 0.05       |
| Foliar Zn                                    | <i>F</i> -value | 1.3           | 1.48      | 0.44       |
|                                              | <i>P</i> -value | 0.03          | 0.23      | ii         |

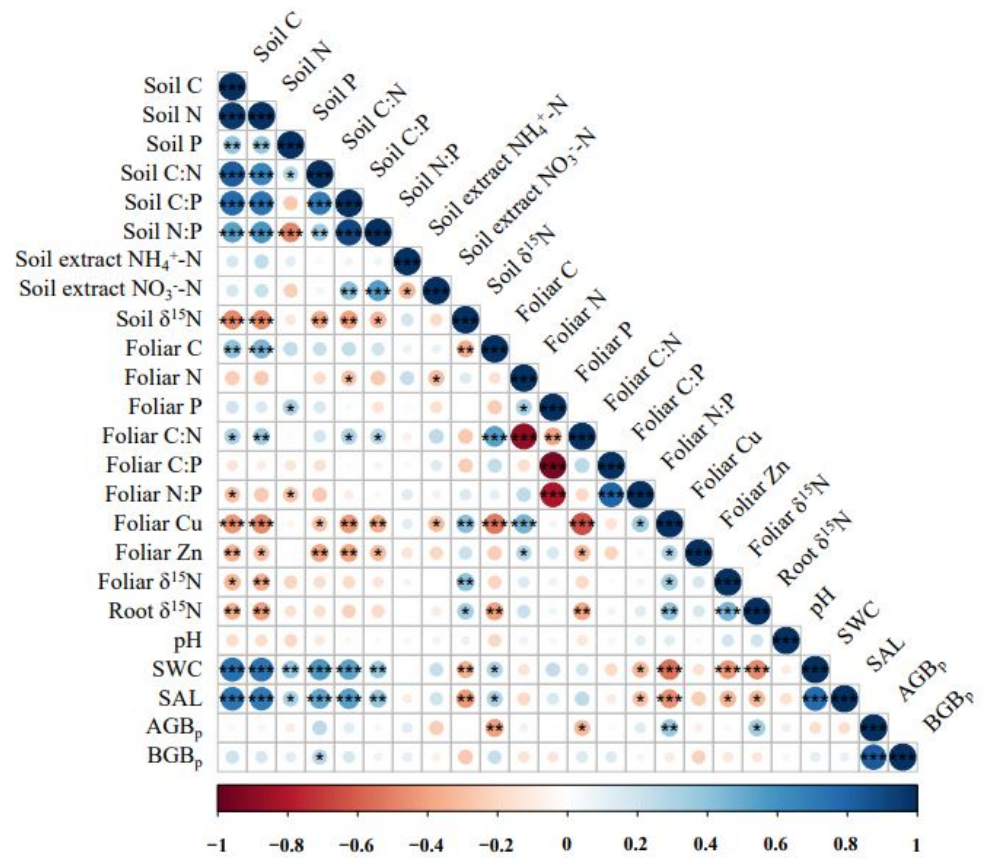

**Figure S1.** Relationships between C, N and P concentrations and their stoichiometric ratios in soil and plants, foliar,  $\delta^{15}\text{N}$  of soil and plants, environmental factors, aboveground biomass and under-ground biomass of per plant.
